# Supplementary material for: High expression of small GTPase Rab3D promotes cancer progression and metastasis
Source: PubMed Central journal article supplement (PMC4484444; doi:10.18632/oncotarget.3575), 2015-03-14
Supplement: oncotarget-06-11125-s001.pdf [file oncotarget-06-11125-s001.pdf]

# High expression of small GTPase Rab3D promotes cancer progression and metastasis

## Supplemental Material

### Antibodies and Reagents

The primary antibodies used in this study were 1:4000 Rat anti-human Hsp90 $\alpha$  mAb (Stressgen, Canada), 1:3000 Rabbit anti-Rab3D mAb (Epitomics), 1:1000 mouse anti-Alix mAb (Santa Cruz Biotechnology, USA), 1:2000 mouse anti-GAPDH mAb (ZSGB-BIO, China), 1:1000 Rabbit anti-CD63 pAb (Bioworld, China), 1:500 Rabbit anti-N-cadherin pAb (Bioworld, China), 1:500 Rabbit anti-E-cadherin pAb (Bioworld, China), 1:1000 Rabbit anti-Snail1 pAb (Bioworld, China), 1:1000 Rabbit anti-Twist pAb (Proteintech, USA) and 1:1000 Rabbit anti-ZEB1 pAb (Proteintech, USA). An anti-Hsp90 $\alpha$  monoclonal neutralizing antibody, developed by our lab, used in *in vitro* studies and animal studies can cross react with human Hsp90 $\alpha$ . Its specificity and efficiency were verified by Western Blot and ELISA.

### Cell invasion assay

For the Matrigel invasion assay,  $5 \times 10^4$  cells in serum-free culture medium were inoculated into the 6.5-mm millicell inserts (8  $\mu$ m pore size, Millipore, USA) coated with Matrigel (BD, USA) on the upper side of the filter membranes. 1% serum was added in the culture medium in the lower chamber. Parallel repetition of experiment was at least twice. Then the cells were allowed to migrate through the inserts for 48 h. Cells at the lower surface of the filter membranes were stained with 1% eosin and counted by microscope in 5 random fields per insert (magnification,  $\times 100$ ).

### Wound healing assays

Cells were grown on 6-well plates. The monolayer was disrupted with a cell scraper of 1 mm, and filmed at 0, 36 h in a phase contrast video microscope (Nikon ELWD 0.3) (magnification,

×100). Experiments were done in duplicate, and nine fields of each well were recorded. Relative migrated distance was calculated between the wound edges at different time points.

### **Cell proliferation assay**

100  $\mu$ L of control and Rab3D knockdown MDA-MB231 cells or Rab3D-overexpressing MCF-7 cells suspension ( $2 \times 10^4$  /mL) were seeded on 96-well plates in DMEM containing 2 % FBS for 48 hours. 20  $\mu$ L of CCK-8 (Dojindo) is added into each well and incubated for 2 hours. The absorption was detected at 450 nm.

### **Quantitative Real-time PCR**

Total RNA was isolated using the Trizol reagent (Invitrogen) according to the manufacturer's protocol. First-strand cDNA was synthesized using Revert Aid First-strand cDNA synthesis kit (Thermo). Quantitative real-time PCR was performed using the comparative Cr method to detect relative gene expression.

### **Exosomes isolation**

Cells were cultured in the medium without FBS (FBS, Hyclone). Exosomes were purified by sequential centrifugation steps (1). Supernatant fractions were centrifuged at 300 g for 10 min, 20,000 g for 30 min and then at 100,000 g for 120 min. The exosomes pellets were resuspended in PBS and collected by ultracentrifugation at 100,000 g for 120 min (Beckman).

### **Mass Spectrometry**

The analyses were performed as previously described (2). Gel bands were digested by trypsin. Peptide mixture was analyzed by liquid chromatography–mass spectrometry (Agilent 6300 Series Ion Trap Liquid Chromatography/ Mass Systems). The MS data were searched against a subset of mouse proteins from the SWISS-PROT protein sequence database. Peptide confidence is high.

### **Electron microscopy**

Exosomes were dropped onto a formvar-carbon-coated grid and fixed in 4% paraformaldehyde. After washing in PBS, the exosomes were washed in water and stained with saturated aqueous uranyl oxalate for 5 min. The excess liquid was then removed. The grid was dried at room temperature for 10 min and viewed at 20,000 and 50,000 magnification using an electron microscope (Hitachi).

### **Dynamic light scattering (DLS)**

The mean hydrodynamic diameter of exosomes and size distribution was estimated by dynamic light scattering (DLS). The light scattering was recorded with 5 replicate measurements.

**Table S1. Characteristics of benign and malignant breast cancer patients in tissue microarray assays**

**Table S2. Characteristics of 12 different cancer patient samples and cancer adjacent normal tissues**

**Table S3. Characteristics of 100 malignant breast cancer patient samples with define TNM and grade**

Table S1. Tumor composition of 50 patients samples with clinic-pathological parameters

| Number  | Gender | Year | Organ  | pathologic diagnosis      | Grade | Type      | Score |
|---------|--------|------|--------|---------------------------|-------|-----------|-------|
| A1, A2  | F      | 65   | Breast | Invasive ductal carcinoma | 1     | Malignant | 1     |
| A3, A4  | F      | 38   | Breast | Invasive ductal carcinoma | 2     | Malignant | 3     |
| A5, A6  | F      | 53   | Breast | Invasive ductal carcinoma | 2     | Malignant | 2     |
| A7, A8  | F      | 28   | Breast | Invasive ductal carcinoma | 2     | Malignant | 3     |
| A9, A10 | F      | 29   | Breast | Invasive ductal carcinoma | 1     | Malignant | 2     |
| B1, B2  | F      | 72   | Breast | Invasive ductal carcinoma | 2     | Malignant | 0     |
| B3, B4  | F      | 62   | Breast | Invasive ductal carcinoma | 2     | Malignant | 2     |
| B5, B6  | F      | 68   | Breast | Invasive ductal carcinoma | 2     | Malignant | 3     |
| B7, B8  | F      | 53   | Breast | Mucinous adenocarcinoma   | 1     | Malignant | 1     |
| B9, B10 | F      | 66   | Breast | Mucinous adenocarcinoma   | 1     | Malignant | 2     |
| C1, C2  | F      | 47   | Breast | Mucinous adenocarcinoma   | 1     | Malignant | 1     |
| C3, C4  | F      | 65   | Breast | Mucinous adenocarcinoma   | 2     | Malignant | 2     |
| C5, C6  | F      | 52   | Breast | Mucinous adenocarcinoma   | 2     | Malignant | 2     |
| C7, C8  | F      | 41   | Breast | Mucinous adenocarcinoma   | 2     | Malignant | 0     |
| C9, C10 | F      | 40   | Breast | Mucinous adenocarcinoma   | 2-3   | Malignant | 2     |
| D1, D2  | F      | 45   | Breast | Mucinous adenocarcinoma   | 2     | Malignant | 2     |
| D3, D4  | F      | 53   | Breast | Medullary carcinoma       | -     | Malignant | 2     |
| D5, D6  | F      | 60   | Breast | Medullary carcinoma       | -     | Malignant | 3     |
| D7, D8  | F      | 51   | Breast | Medullary carcinoma       | -     | Malignant | 2     |
| D9, D10 | F      | 31   | Breast | Medullary carcinoma       | -     | Malignant | 2     |
| E1, E2  | F      | 72   | Breast | Medullary carcinoma       | -     | Malignant | 2     |
| E3, E4  | F      | 55   | Breast | Medullary carcinoma       | -     | Malignant | 2     |
| E5, E6  | F      | 58   | Breast | Paget's disease           | -     | Malignant | 3     |
| E7, E8  | F      | 53   | Breast | Paget's disease           | -     | Malignant | 3     |
| E9, E10 | F      | 63   | Breast | Paget's disease           | -     | Malignant | 3     |
| F1, F2  | F      | 82   | Breast | Paget's disease           | -     | Malignant | 3     |
| F3, F4  | F      | 87   | Breast | Carcinosarcoma            | -     | Malignant | 3     |
| F5, F6  | F      | 39   | Breast | Carcinosarcoma            | -     | Malignant | 1     |
| F7, F8  | F      | 33   | Breast | Cystosarcoma phyllodes    | -     | Malignant | 3     |
| F9, F10 | F      | 48   | Breast | Cystosarcoma phyllodes    | -     | Malignant | 1     |
| G1, G2  | F      | 40   | Breast | Cystosarcoma phyllodes    | -     | Malignant | 0     |
| G3, G4  | F      | 32   | Breast | Cystosarcoma phyllodes    | -     | Malignant | 2     |
| G5, G6  | F      | 37   | Breast | Cystosarcoma phyllodes    | -     | Malignant | 3     |
| G7, G8  | F      | 69   | Breast | Cystosarcoma phyllodes    | -     | Malignant | 2     |
| G9, G10 | F      | 40   | Breast | Cystosarcoma phyllodes    | -     | Malignant | 0     |
| H1, H2  | F      | 40   | Breast | Cystosarcoma phyllodes    | -     | Malignant | 0     |
| H3, H4  | F      | 30   | Breast | Fibroadenoma              | -     | Benign    | 1     |

|         |   |    |        |                                       |   |        |   |
|---------|---|----|--------|---------------------------------------|---|--------|---|
| H5, H6  | F | 23 | Breast | Fibroadenoma                          | - | Benign | 1 |
| H7, H8  | F | 23 | Breast | Fibroadenoma                          | - | Benign | 1 |
| H9, H10 | F | 32 | Breast | Fibroadenoma                          | - | Benign | 1 |
| I1, I2  | F | 19 | Breast | Fibroadenoma                          | - | Benign | 1 |
| I3, I4  | F | 42 | Breast | Fibroadenoma                          | - | Benign | 0 |
| I5, I6  | F | 34 | Breast | Fibroadenoma                          | - | Benign | 0 |
| I7, I8  | F | 46 | Breast | Fibroadenoma                          | - | Benign | 1 |
| I9, I10 | F | 42 | Breast | Cancer adjacent normal breast tissues | - | Normal | 0 |
| J1, J2  | F | 50 | Breast | Cancer adjacent normal breast tissues | - | Normal | 0 |
| J3, J4  | F | 57 | Breast | Cancer adjacent normal breast tissues | - | Normal | 0 |
| J5, J6  | F | 47 | Breast | Cancer adjacent normal breast tissues | - | Normal | 0 |
| J7, J8  | F | 39 | Breast | Cancer adjacent normal breast tissues | - | Normal | 0 |
| J9, J10 | F | 38 | Breast | Cancer adjacent normal breast tissues | - | Normal | 0 |

Table S2. Tumor composition of 12 patient samples with clinic-pathological parameters

| Number | Gender | Year | Organ          | pathologic diagnosis                          | Grade | Stage | Type      |
|--------|--------|------|----------------|-----------------------------------------------|-------|-------|-----------|
| A1     | M      | 71   | Prostate       | Adenocarcinoma                                | 1     | II    | Malignant |
| A2     | M      | 71   | Prostate       | Cancer adjacent normal prostate tissue        | -     | -     | NAT       |
| A3     | M      | 55   | Lung           | Squamous cell carcinoma                       | 2     | II    | Malignant |
| A4     | M      | 55   | Lung           | Cancer adjacent normal lung tissue            | -     | -     | NAT       |
| A5     | M      | 54   | Colon          | Adenocarcinoma                                | 2     | I     | Malignant |
| A6     | M      | 54   | Colon          | Cancer adjacent normal colon tissue           | -     | -     | NAT       |
| B1     | F      | 40   | Breast         | Invasive ductal carcinoma                     | 2     | Ib    | Malignant |
| B2     | F      | 40   | Breast         | Cancer adjacent normal breast tissue          | -     | -     | NAT       |
| B3     | F      | 68   | Ovary          | Serous adenocarcinoma                         | -     | II    | Malignant |
| B4     | F      | 68   | Ovary          | Cancer adjacent normal ovary tissue           | -     | -     | NAT       |
| B5     | F      | 50   | Uterine cervix | Squamous cell carcinoma                       | 3     | I     | Malignant |
| B6     | F      | 50   | Uterine cervix | Cancer adjacent normal cervical canals tissue | -     | -     | NAT       |
| C1     | F      | 49   | Esophagus      | Squamous cell carcinoma                       | 1     | Ila   | Malignant |
| C2     | F      | 49   | Esophagus      | Cancer adjacent normal esophagus tissue       | -     | -     | NAT       |
| C3     | F      | 78   | Stomach        | Adenocarcinoma                                | 1     | II    | Malignant |
| C4     | F      | 78   | Stomach        | Cancer adjacent normal stomach tissue         | -     | -     | NAT       |
| C5     | F      | 65   | Liver          | Hepatocellular carcinoma                      | 2     | II    | Malignant |
| C6     | F      | 65   | Liver          | Cancer adjacent normal hepatic tissue         | -     | -     | NAT       |
| D1     | M      | 41   | Kidney         | Clear cell carcinoma                          | 2     | I     | Malignant |
| D2     | M      | 41   | Kidney         | Cancer adjacent normal kidney tissue          | -     | -     | NAT       |
| D3     | M      | 52   | Skin           | Malignant melanoma of right heel              | -     | IV    | Malignant |
| D4     | M      | 52   | Skin           | Cancer adjacent normal skin tissue            | -     | -     | NAT       |
| D5     | M      | 51   | Cerebrum       | Glioblastoma                                  | 4     | -     | Malignant |

Table S3. Tumor composition of 110 patients samples with clinic-pathological parameters

| Number | Gender | Year | Organ  | pathologic diagnosis      | Grade | Stage | Score |
|--------|--------|------|--------|---------------------------|-------|-------|-------|
| A1     | F      | 39   | Breast | Invasive ductal carcinoma | 1     | Ila   | 1     |
| A2     | F      | 48   | Breast | Invasive ductal carcinoma | 1     | IIIb  | 1     |
| A3     | F      | 43   | Breast | Invasive ductal carcinoma | 2     | I     | 1     |
| A4     | F      | 45   | Breast | Invasive ductal carcinoma | 2     | IIIb  | 2     |
| A5     | F      | 53   | Breast | Invasive ductal carcinoma | 1     | Ila   | 3     |
| A6     | F      | 53   | Breast | Invasive ductal carcinoma | 2     | Ilb   | 0     |
| A7     | F      | 48   | Breast | Invasive ductal carcinoma | 1     | IIIb  | 1     |
| A8     | F      | 37   | Breast | Invasive ductal carcinoma | 1     | Ila   | 1     |
| A9     | F      | 32   | Breast | Invasive ductal carcinoma | 1     | Ila   | 3     |
| A10    | F      | 32   | Breast | Invasive ductal carcinoma | 1     | Ila   | 2     |
| B1     | F      | 41   | Breast | Invasive ductal carcinoma | 1     | IIIa  | 1     |
| B2     | F      | 55   | Breast | Invasive ductal carcinoma | 1     | Ila   | 2     |
| B3     | F      | 67   | Breast | Invasive ductal carcinoma | 1     | Ila   | 1     |
| B4     | F      | 34   | Breast | Invasive ductal carcinoma | 1     | Ilb   | 2     |
| B5     | F      | 46   | Breast | Invasive ductal carcinoma | 2     | I     | 0     |
| B6     | F      | 49   | Breast | Invasive ductal carcinoma | 1     | Ila   | 1     |
| B7     | F      | 47   | Breast | Invasive ductal carcinoma | 1-2   | I     | 0     |
| B8     | F      | 48   | Breast | Invasive ductal carcinoma | 1     | IIIb  | 1     |
| B9     | F      | 52   | Breast | Invasive ductal carcinoma | 1     | IIIa  | 2     |
| B10    | F      | 61   | Breast | Invasive ductal carcinoma | 1     | IIIa  | 3     |
| C1     | F      | 38   | Breast | Invasive ductal carcinoma | 2     | Ila   | 2     |
| C2     | F      | 45   | Breast | Invasive ductal carcinoma | 2     | Ila   | 2     |
| C3     | F      | 38   | Breast | Invasive ductal carcinoma | 2     | Ilb   | 1     |
| C4     | F      | 63   | Breast | Invasive ductal carcinoma | 1     | I     | 1     |
| C5     | F      | 32   | Breast | Invasive ductal carcinoma | 2     | Ila   | 1     |
| C6     | F      | 45   | Breast | Invasive ductal carcinoma | 2     | Ila   | 0     |
| C7     | F      | 54   | Breast | Invasive ductal carcinoma | 1     | Ila   | 2     |
| C8     | F      | 47   | Breast | Invasive ductal carcinoma | 2     | Ilb   | 1     |
| C9     | F      | 51   | Breast | Invasive ductal carcinoma | 2     | IIIa  | 3     |
| C10    | F      | 45   | Breast | Invasive ductal carcinoma | 2     | I     | 3     |
| D1     | F      | 40   | Breast | Invasive ductal carcinoma | 2     | I     | 1     |
| D2     | F      | 50   | Breast | Invasive ductal carcinoma | 2     | Ila   | 2     |
| D3     | F      | 56   | Breast | Invasive ductal carcinoma | 2     | Ila   | 3     |
| D4     | F      | 55   | Breast | Invasive ductal carcinoma | 2     | Ila   | 3     |
| D5     | F      | 59   | Breast | Invasive ductal carcinoma | 2     | Ila   | 1     |
| D6     | F      | 53   | Breast | Invasive ductal carcinoma | 2     | Ilb   | 1     |

|     |   |    |        |                           |   |      |   |
|-----|---|----|--------|---------------------------|---|------|---|
| D7  | F | 57 | Breast | Invasive ductal carcinoma | 2 | Ila  | 2 |
| D8  | F | 51 | Breast | Invasive ductal carcinoma | 2 | Ilb  | 1 |
| D9  | F | 64 | Breast | Invasive ductal carcinoma | 2 | Ila  | 2 |
| D10 | F | 54 | Breast | Invasive ductal carcinoma | 2 | I    | 2 |
| E1  | F | 30 | Breast | Invasive ductal carcinoma | 2 | I    | 2 |
| E2  | F | 63 | Breast | Invasive ductal carcinoma | 2 | Ila  | 1 |
| E3  | F | 65 | Breast | Invasive ductal carcinoma | 2 | Ila  | 1 |
| E4  | F | 68 | Breast | Invasive ductal carcinoma | 2 | Ila  | 2 |
| E5  | F | 45 | Breast | Invasive ductal carcinoma | 2 | IIIb | 3 |
| E6  | F | 58 | Breast | Invasive ductal carcinoma | 2 | Ila  | 0 |
| E7  | F | 42 | Breast | Invasive ductal carcinoma | - | Ila  | 1 |
| E8  | F | 40 | Breast | Invasive ductal carcinoma | 2 | Ila  | 1 |
| E9  | F | 42 | Breast | Invasive ductal carcinoma | 2 | Ila  | 2 |
| E10 | F | 46 | Breast | Invasive ductal carcinoma | 2 | Ila  | 1 |
| F1  | F | 39 | Breast | Invasive ductal carcinoma | 2 | IIIb | 3 |
| F2  | F | 46 | Breast | Invasive ductal carcinoma | - | Ila  | 0 |
| F3  | F | 46 | Breast | Invasive ductal carcinoma | 2 | Ila  | 2 |
| F4  | F | 46 | Breast | Invasive ductal carcinoma | 2 | IIIb | 3 |
| F5  | F | 39 | Breast | Invasive ductal carcinoma | 2 | Ila  | 2 |
| F6  | F | 46 | Breast | Invasive ductal carcinoma | 2 | Ilb  | 2 |
| F7  | F | 32 | Breast | Invasive ductal carcinoma | 2 | Ilb  | 1 |
| F8  | F | 48 | Breast | Invasive ductal carcinoma | 2 | Ila  | 1 |
| F9  | F | 46 | Breast | Invasive ductal carcinoma | 2 | IIIb | 1 |
| F10 | F | 47 | Breast | Invasive ductal carcinoma | 2 | Ilb  | 2 |
| G1  | F | 50 | Breast | Invasive ductal carcinoma | 2 | Ila  | 1 |
| G2  | F | 43 | Breast | Invasive ductal carcinoma | 2 | I    | 2 |
| G3  | F | 48 | Breast | Invasive ductal carcinoma | 2 | Ila  | 1 |
| G4  | F | 49 | Breast | Invasive ductal carcinoma | 2 | Ila  | 2 |
| G5  | F | 29 | Breast | Invasive ductal carcinoma | 2 | Ila  | 3 |
| G6  | F | 40 | Breast | Invasive ductal carcinoma | - | IIIb | 3 |
| G7  | F | 38 | Breast | Invasive ductal carcinoma | 1 | I    | 1 |
| G8  | F | 38 | Breast | Invasive ductal carcinoma | 2 | Ilb  | 3 |
| G9  | F | 62 | Breast | Invasive ductal carcinoma | 2 | Ila  | 2 |
| G10 | F | 44 | Breast | Invasive ductal carcinoma | 1 | I    | 1 |
| H1  | F | 68 | Breast | Invasive ductal carcinoma | 2 | Ila  | 2 |
| H2  | F | 40 | Breast | Invasive ductal carcinoma | 1 | Ilb  | 3 |
| H3  | F | 53 | Breast | Invasive ductal carcinoma | 2 | Ila  | 2 |
| H4  | F | 63 | Breast | Invasive ductal carcinoma | 2 | Ila  | 2 |
| H5  | F | 48 | Breast | Invasive ductal carcinoma | 2 | IIIb | 3 |



|     |   |    |        |                                      |     |      |   |
|-----|---|----|--------|--------------------------------------|-----|------|---|
| H6  | F | 62 | Breast | Invasive ductal carcinoma            | 2   | IIb  | 3 |
| H7  | F | 46 | Breast | Invasive ductal carcinoma            | 2   | I    | 1 |
| H8  | F | 50 | Breast | Invasive ductal carcinoma            | 2   | IIa  | 1 |
| H9  | F | 39 | Breast | Invasive ductal carcinoma            | 2   | IIa  | 1 |
| H10 | F | 60 | Breast | Invasive ductal carcinoma            | 2   | IIIb | 3 |
| I1  | F | 41 | Breast | Invasive ductal carcinoma            | 2   | IIIb | 2 |
| I2  | F | 37 | Breast | Invasive ductal carcinoma            | 2   | IIb  | 1 |
| I3  | F | 40 | Breast | Invasive ductal carcinoma            | 2   | IIa  | 2 |
| I4  | F | 49 | Breast | Invasive ductal carcinoma            | 2   | IIa  | 1 |
| I5  | F | 50 | Breast | Invasive ductal carcinoma            | -   | IIb  | 0 |
| I6  | F | 48 | Breast | Invasive ductal carcinoma            | 2   | I    | 1 |
| I7  | F | 74 | Breast | Invasive ductal carcinoma            | 2   | IIa  | 2 |
| I8  | F | 74 | Breast | Invasive ductal carcinoma            | -   | IIa  | 0 |
| I9  | F | 40 | Breast | Invasive ductal carcinoma            | 2   | IV   | 3 |
| I10 | F | 70 | Breast | Invasive ductal carcinoma            | 2   | IIa  | 1 |
| J1  | F | 64 | Breast | Invasive ductal carcinoma            | -   | IIa  | 1 |
| J2  | F | 52 | Breast | Invasive ductal carcinoma            | 2-3 | IIb  | 2 |
| J3  | F | 35 | Breast | Invasive ductal carcinoma            | 2-3 | IIa  | 2 |
| J4  | F | 53 | Breast | Invasive ductal carcinoma            | 2   | IIa  | 2 |
| J5  | F | 52 | Breast | Invasive ductal carcinoma            | 3   | I    | 2 |
| J6  | F | 41 | Breast | Invasive ductal carcinoma            | 3   | IIa  | 2 |
| J7  | F | 56 | Breast | Invasive ductal carcinoma            | 2   | IIa  | 2 |
| J8  | F | 46 | Breast | Invasive ductal carcinoma            | 3   | IIIb | 3 |
| J9  | F | 44 | Breast | Invasive ductal carcinoma            | 3   | IIa  | 1 |
| J10 | F | 38 | Breast | Invasive ductal carcinoma            | 3   | IIa  | 1 |
| K1  | F | 43 | Breast | Cancer adjacent normal breast tissue | -   | -    | 0 |
| K2  | F | 42 | Breast | Cancer adjacent normal breast tissue | -   | -    | 0 |
| K3  | F | 47 | Breast | Cancer adjacent normal breast tissue | -   | -    | 0 |
| K4  | F | 39 | Breast | Cancer adjacent normal breast tissue | -   | -    | 0 |
| K5  | F | 49 | Breast | Cancer adjacent normal breast tissue | -   | -    | 0 |
| K6  | F | 53 | Breast | Cancer adjacent normal breast tissue | -   | -    | 0 |
| K7  | F | 51 | Breast | Cancer adjacent normal breast tissue | -   | -    | 0 |
| K8  | F | 18 | Breast | Cancer adjacent normal breast tissue | -   | -    | 0 |
| K9  | F | 44 | Breast | Cancer adjacent normal breast tissue | -   | -    | 0 |
| K10 | F | 39 | Breast | Cancer adjacent normal breast tissue | -   | -    | 0 |

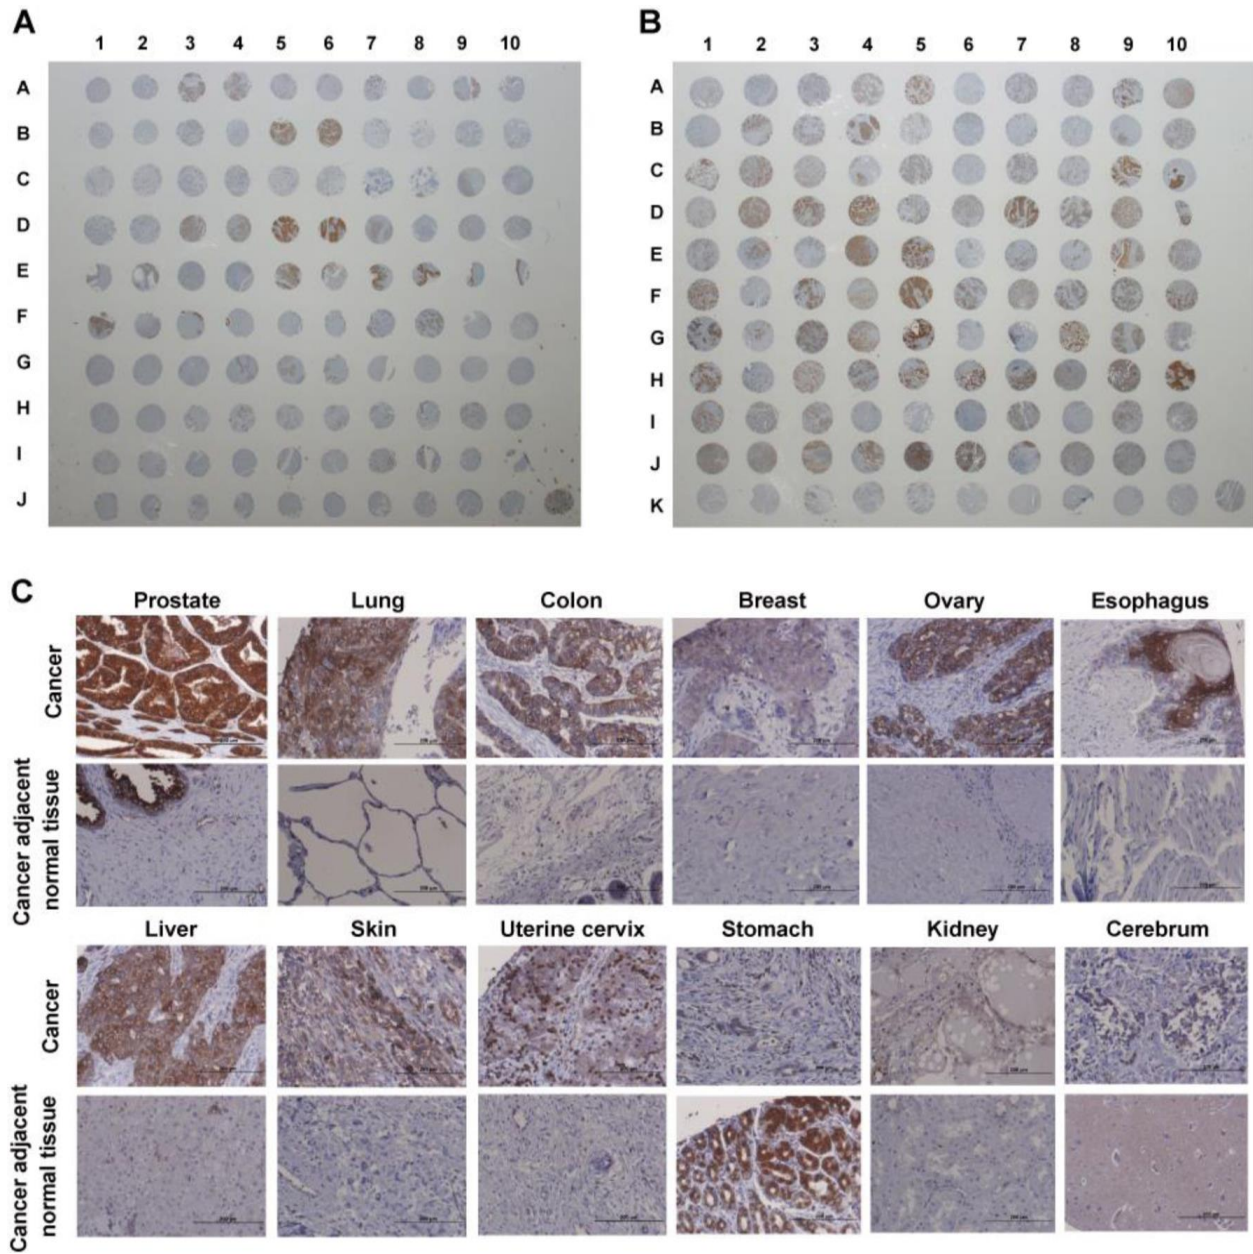

**Fig. S1: Rab3D staining in different malignant cancer samples**

(A-B) Related to Figure 1E and 1G. Overview of the immunohistochemistry results. Numbers up the microarrays and capital letters at the left can locate each tissue point. (C). Rab3D staining in 12 carcinomas (prostate, lung, colon, breast, ovary, uterine, esophagus, stomach, liver, kidney, skin and cerebrum) and their normal tissues near the cancer by IHC assay.

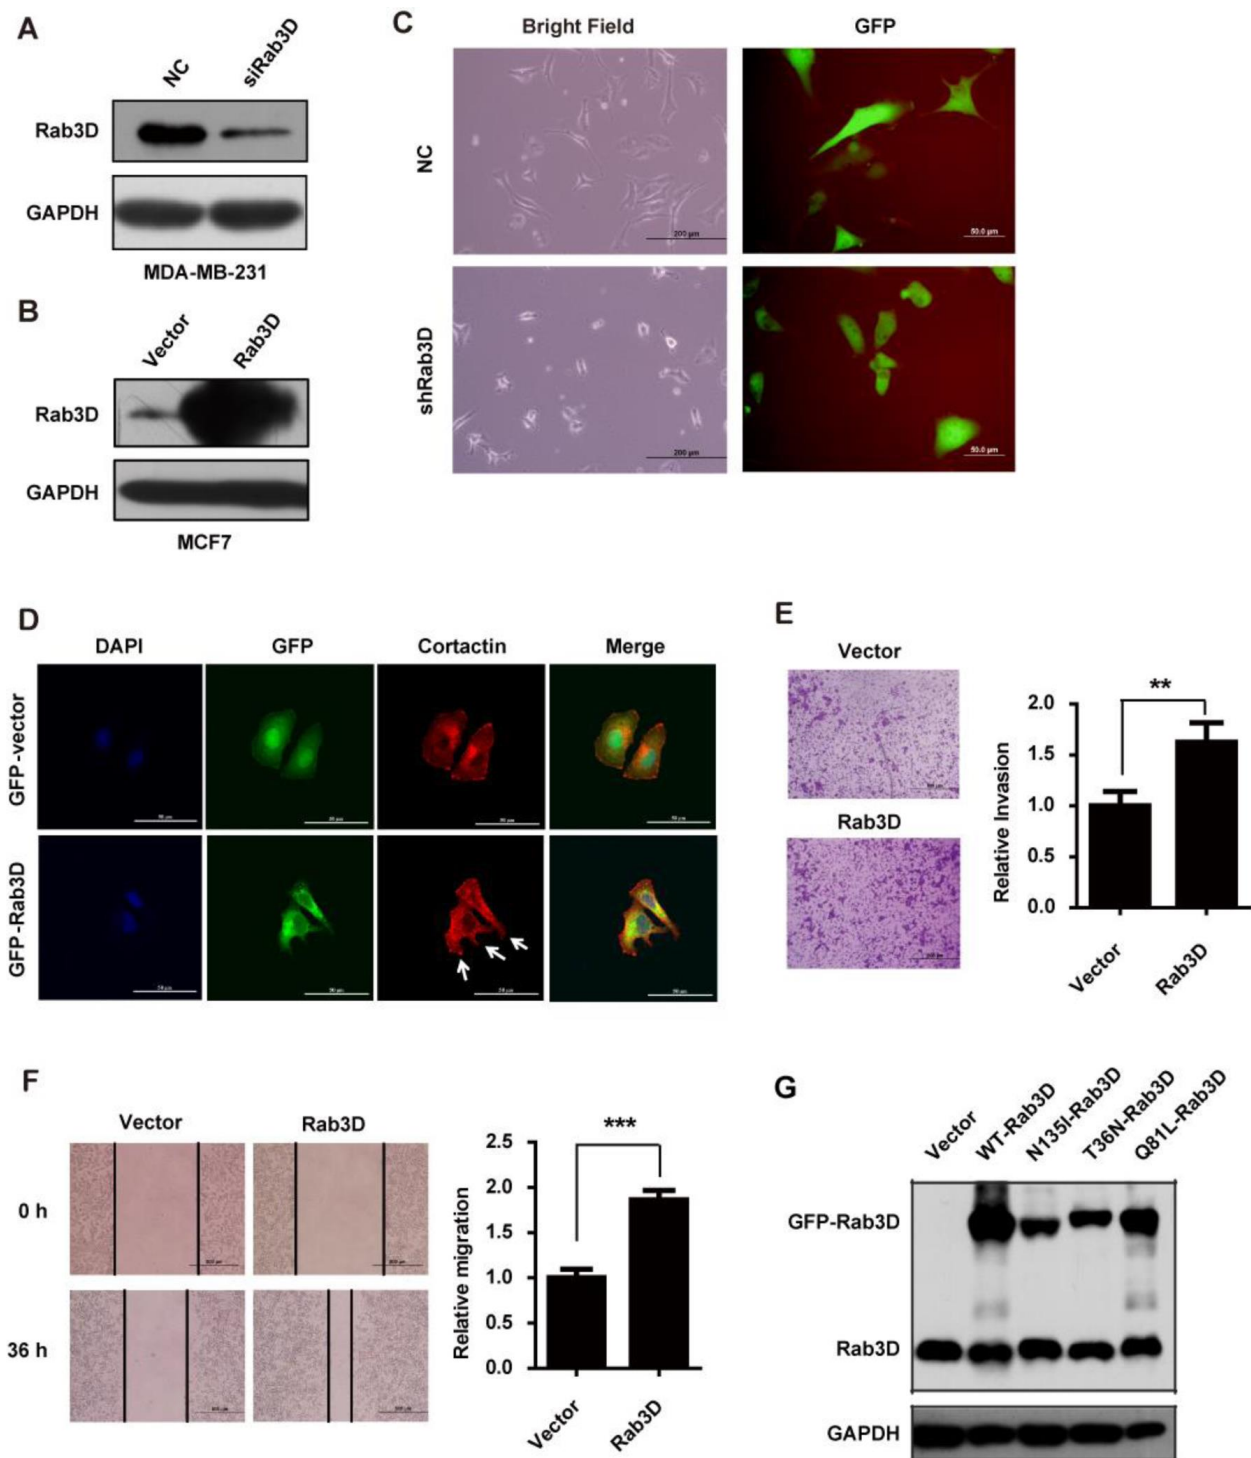

**Fig. S2: The role of Rab3D in tumor cell motility**

(A-B). Transfection efficiency. MCF-7 cells were transfected with GFP-control and GFP-Rab3D plasmid. MDA-MB-231 cells were transfected with scramble RNA and Rab3D siRNA,

separately. (C). The cell morphology in GFP-labeled shRab3D MDA-MB-231 cells. Scale bar, 50  $\mu\text{m}$ . (D). The effect of overexpressing Rab3D on tumor cell morphology. MCF-7 cells were transfected with GFP-Rab3D-expressing plasmid and spreading protrusions marker cortactin was stained with Dy3 labeled second antibody. (E). Over-expressing Rab3D in MCF-7 resulted in dramatically increased cell motility (migration). Representative images and quantification of migration assay by MCF-7 cells transfected to express Rab3D. Scale bar, 200  $\mu\text{m}$ . \*\*  $p < 0.01$ . (F). Over-expressing Rab3D in MCF-7 resulted in dramatically increased cell invasion. Representative images and quantification of the invasive phenotype induced by Rab3D MCF-7 cells. Scale bar, 100  $\mu\text{m}$ . \*\*\*  $p < 0.001$ . (G). Western Blot analysis of Rab3D mutants.

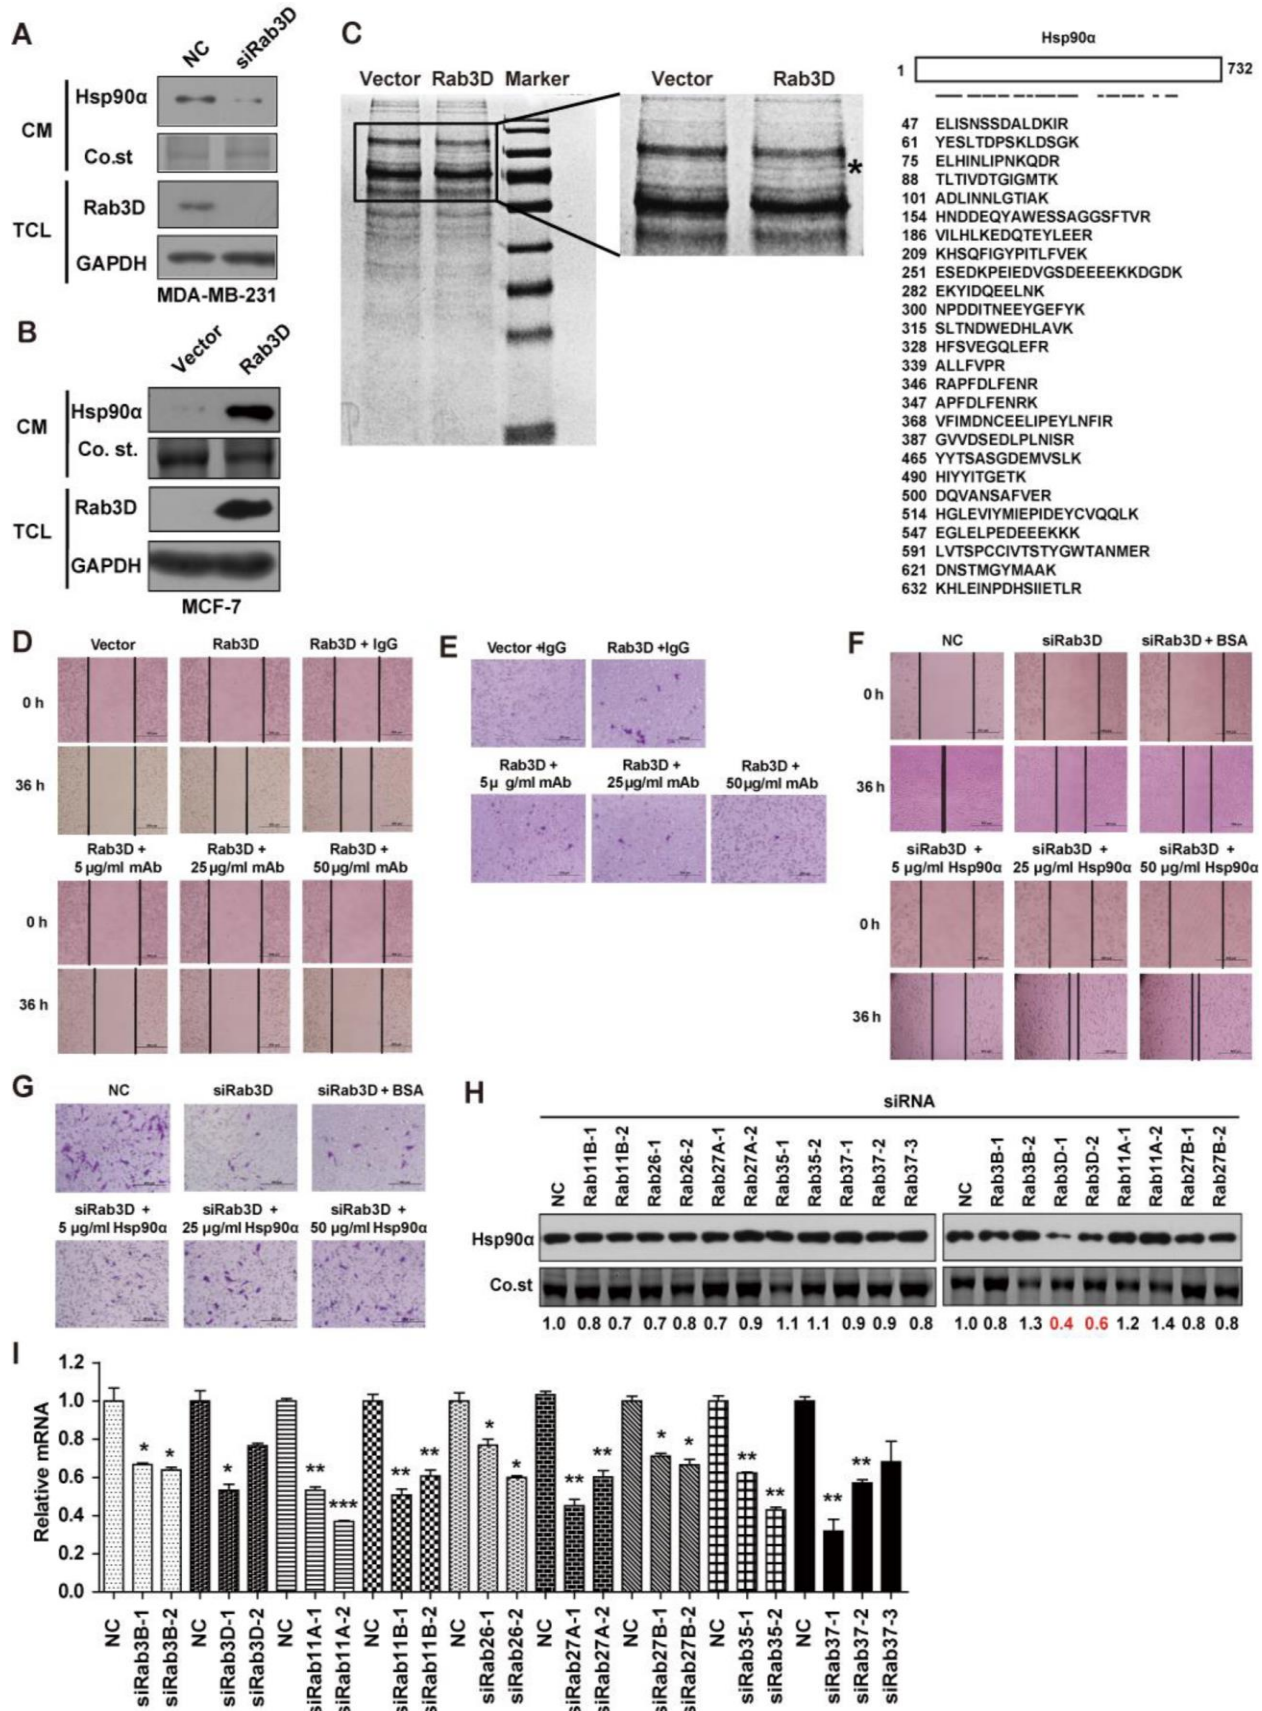

**Fig. S3. Effect of exosome-related Rabs on Hsp90 $\alpha$  secretion**

(A-B). Western Blot analysis of Hsp90 $\alpha$  in CM of MDA-MB-231 cells transfected with scramble RNA or Rab3D siRNA. (C). Mass spectrometry analysis identified Hsp90 $\alpha$  and unique peptides were indicated. (D). Representative images of migration assay. The effect of recombinant Hsp90 $\alpha$  on the migration of MDA-MB-231 transfected with scramble RNA or Rab3D siRNA. Scale bar, 200  $\mu$ m. (E). Representative images of invasion in siRab3D MDA-MB-231 with or without addition of recombinant Hsp90 $\alpha$ . Scale bar, 200  $\mu$ m. (F). Representative images of migration assay. Rab3D-MCF-7 cells were treated with or without Hsp90 $\alpha$  neutralizing antibody. Scale bar, 200  $\mu$ m. (G). Representative images of matrigel invasion assay. The effect of blocking extracellular Hsp90 $\alpha$  in Rab3D-MCF-7 cells. Scale bar, 200  $\mu$ m. (H). MCF-7 cells were transfected with exosome-related Rabs siRNA including Rab3B, Rab3D, Rab11A, Rab11B, Rab27A, Rab27B, Rab35 and Rab37 separately. After 48h, the level of secreted Hsp90 $\alpha$  in the CM was measured by Western Blot assay. (I). mRNA level of Rabs in these cells by real-time qRT-PCR analysis. Statistically significant *P* values are indicated. . \* *p* < 0.05, \*\* *p* < 0.01, \*\*\* *p* < 0.001.

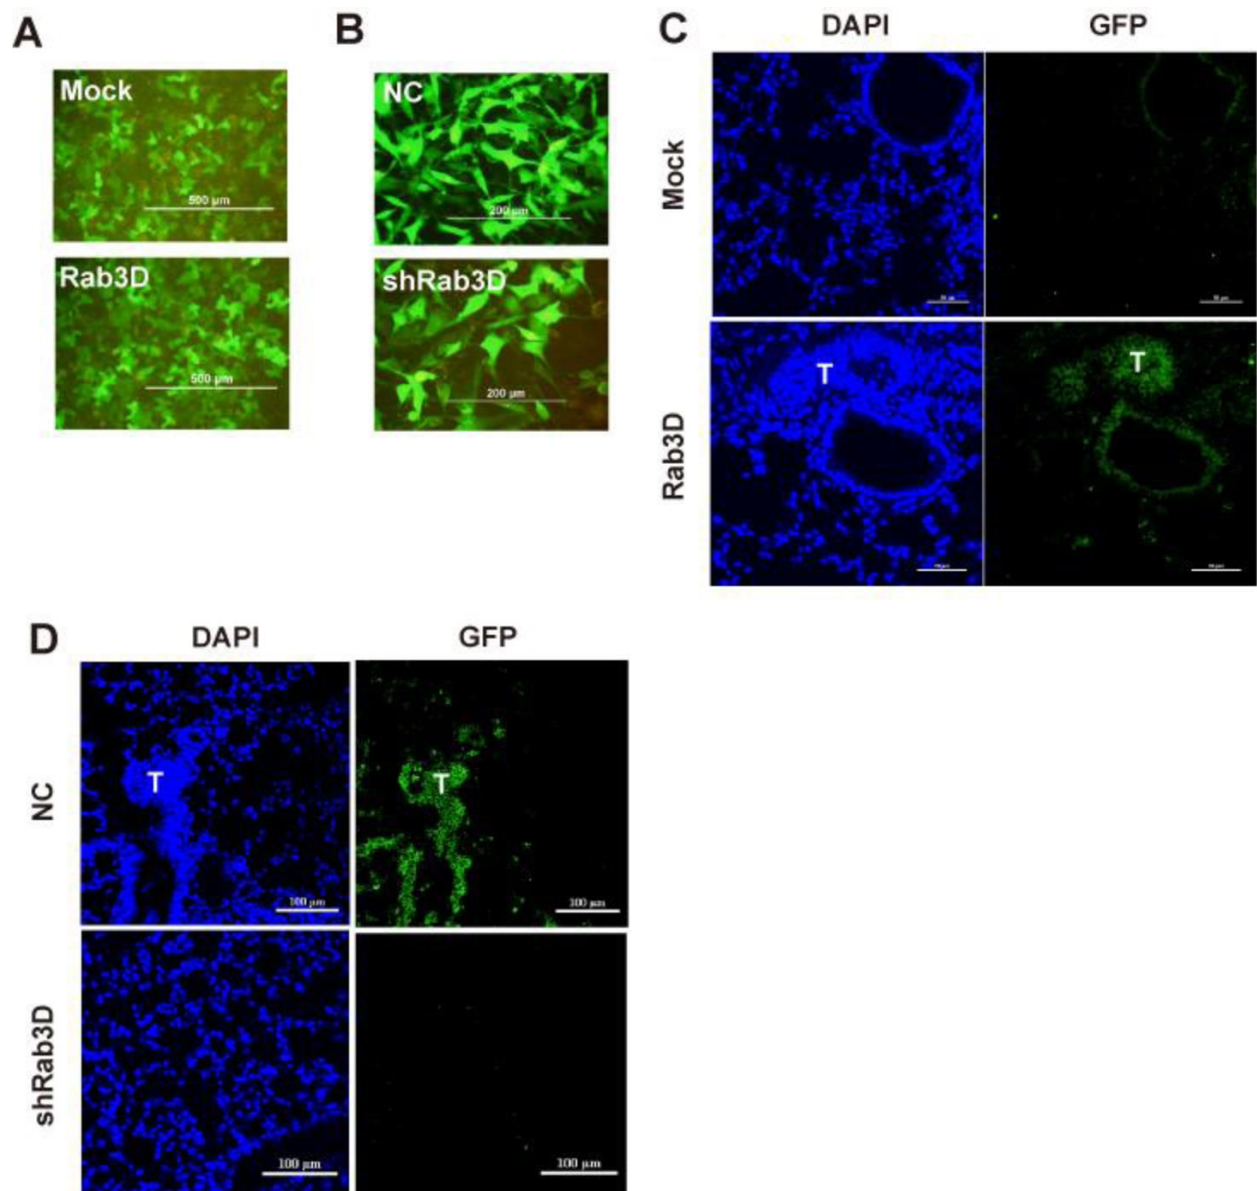

**Fig. S4. The effect of GFP-Rab3D on tumor lung metastasis**

(A-B). Images of stably transfected tumor cell lines. (C). Immunofluorescence images of lung in control and Rab3D-MCF-7 xenografts bearing mice. (D). Immunofluorescence images of lung in control and shRab3D-MDA-MB-231 xenografts bearing mice.

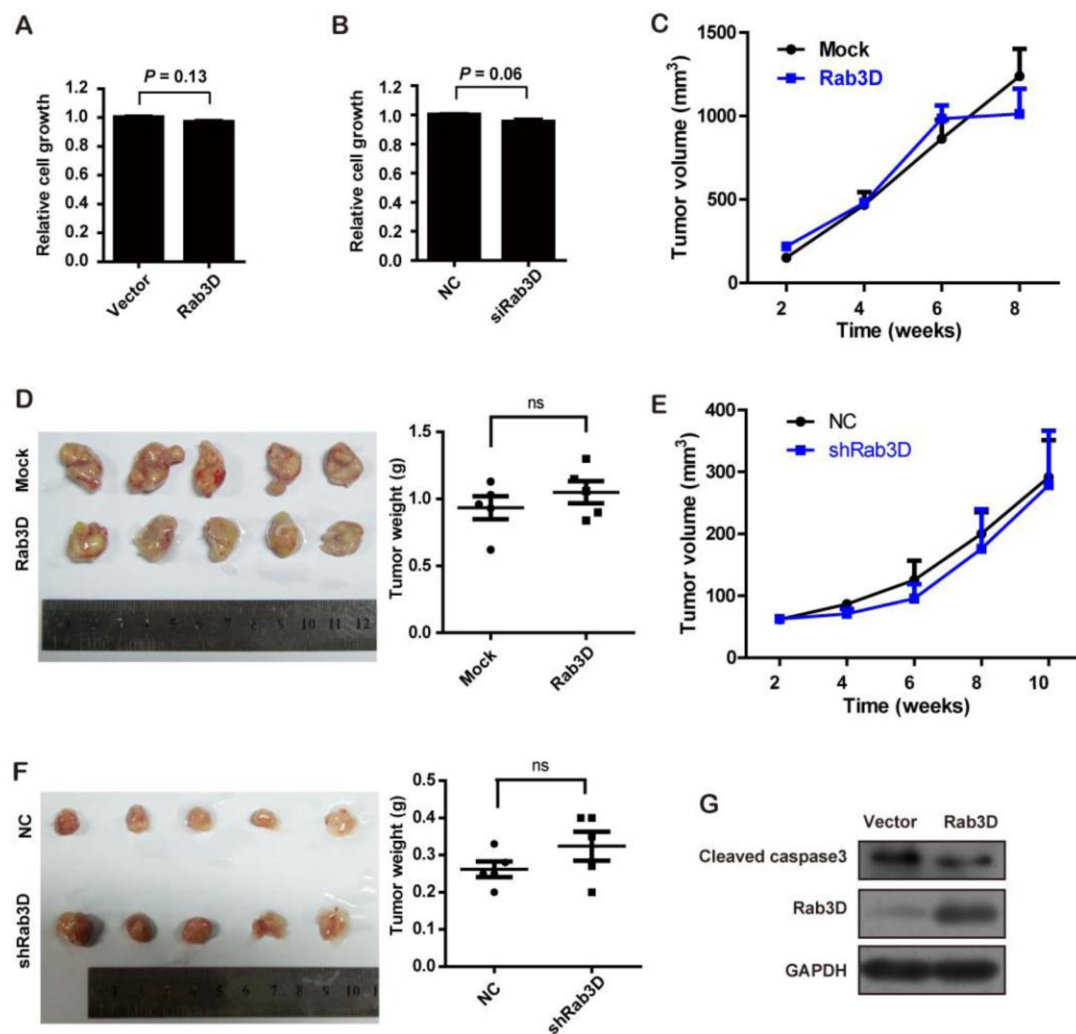

**Fig. S5. *In vitro* and *in vivo* tumor growth**

(A-B). Cell proliferation of siRab3D MDA-MB-231 cells and MCF-7 cells transiently expressed Rab3D. A total of 2000 cells were plated into each well of 96 wells plate for 2 days, and subsequently CCK-8 solution was added and incubated for 2 h. OD value at 450 nm was measured. Statistically significant p values are indicated. (C). Mean tumor volume in nude mice bearing MCF-GFP-Rab3D xenografts ( $n = 5$  mice per group) assessed once every two weeks for 8 weeks. (D). Images of primary tumors (Left) and tumor weight (Right) in MCF-GFP-Rab3D and control group, ns means no significance. (E). Mean tumor volume in nude mice bearing



MDA-MB-231-GFP-shRab3D xenografts ( $n = 5$  mice per group) assessed once every two weeks for 10 weeks. (F). Images of primary tumors (Left) and tumor weight (Right) in MDA-MB-231-GFP-shRab3D and control group. (G). The effect of Rab3D on tumor cell apoptosis.

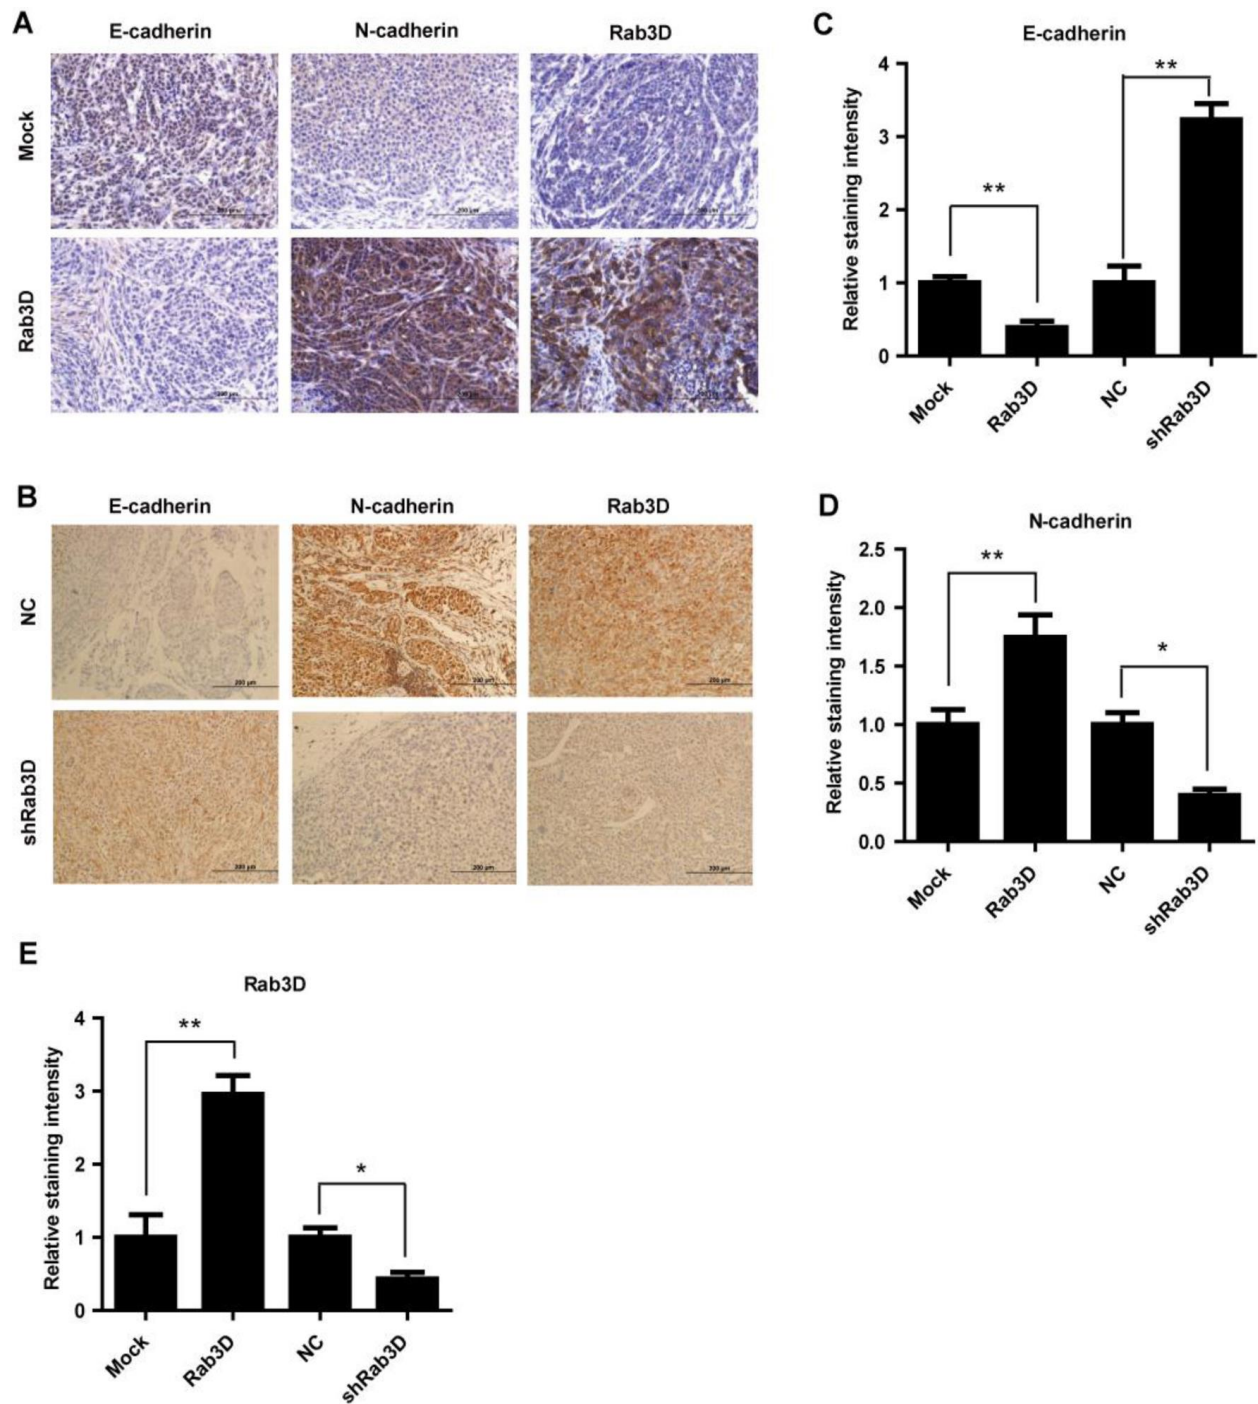

**Fig. S6: Promotion of Rab3D in EMT process**

(A-B). Immunohistochemical staining of E-cadherin or N-cadherin (EMT markers) in xenografts. Scale bar, 50 $\mu$ m. (C-E). Quantification of Immunohistochemical staining intensity. \*  $p < 0.05$ , \*\*  $p < 0.01$ .

## References

1. Gross JC, Chaudhary V, Bartscherer K, Boutros M. Active Wnt proteins are secreted on exosomes. *Nat Cell Biol.* 2012;14:1036-45.
2. Lu XA, Wang X, Zhuo W, Jia L, Jiang Y, Fu Y, et al. The regulatory mechanism of a client kinase controlling its own release from Hsp90 chaperone machinery through phosphorylation. *Biochem J.* 2014;457:171-83.
